# Supplementary material
Source: MDPI journal article supplement (https://www.mdpi.com/2079-6412/13/1/89)
Supplement: s1 [file s1]

# Surface and Tribological Properties of Powder Metallurgical Cp-Ti Titanium Alloy Modified by Shot Peening

Yasemin Yıldırım Avcu <sup>1</sup>, Eleftherios Iakovakis <sup>2</sup>, Mert Guney <sup>3,4,\*</sup>, Emirhan Çalım <sup>1</sup>, Ayşe Özkılınç <sup>1</sup>, Eray Abakay <sup>5</sup>, Fikret Sönmez <sup>6</sup>, Funda Gül Koç <sup>7</sup>, Rıdvan Yamanoglu <sup>7</sup>, Abdulkadir Cengiz <sup>8</sup> and Egemen Avcu <sup>1,9,\*</sup>

<sup>1</sup> Department of Mechanical Engineering, Kocaeli University, Kocaeli 41001, Turkey

<sup>2</sup> Department of Mechanical Aerospace and Civil Engineering, The University of Manchester, Manchester M13 9PL, UK

<sup>3</sup> Department of Civil and Environmental Engineering, Nazarbayev University, Astana 010000, Kazakhstan

<sup>4</sup> The Environment & Resource Efficiency Cluster (EREC), Nazarbayev University, Astana 010000, Kazakhstan

<sup>5</sup> Department of Metallurgy and Materials Engineering, Sakarya University, Sakarya 54050, Turkey

<sup>6</sup> Hasan Ferdi Turgutlu Faculty of Technology, Department of Mechanical Engineering, Manisa Celal Bayar University, Manisa 45140, Turkey

<sup>7</sup> Department of Metallurgy and Materials Engineering, Kocaeli University, Kocaeli 41001, Turkey

<sup>8</sup> Department of Automotive Engineering, Kocaeli University, Kocaeli 41001, Turkey

<sup>9</sup> Ford Otosan Ihsaniye Automotive Vocational School, Kocaeli University, Kocaeli 41650, Turkey

\* Correspondence: mert.guney@nu.edu.kz (M.G.); avcuegemen@gmail.com (E.A.); Tel.: +7-71-7270-4553 (M.G.); +90-26-2435-6167 (E.A.)

## 1. Wear rate calculations

The percentage change of wear rate in shot-peened materials reported in the literature were calculated according to their corresponding wear rate, mass loss, and volume loss values Table 1 outlines the available literature on tribological properties of shot-peened materials, including the materials utilised, shot peening methods and parameters, and tribological testing methods and parameters.

**Table 1.** Wear rate improvement of the present study and literature studies.

| Rf.           | Shot-peened material                   | Shot peening method and parameters                                                   | Tribological testing method and parameters                                            | Wear rate of reference (mm <sup>3</sup> /N.m) | Min. wear rate (mm <sup>3</sup> /N.m) | Max. wear rate (mm <sup>3</sup> /N.m) | % Min. wear rate | % Max. wear rate |
|---------------|----------------------------------------|--------------------------------------------------------------------------------------|---------------------------------------------------------------------------------------|-----------------------------------------------|---------------------------------------|---------------------------------------|------------------|------------------|
| Present study | Cp-Ti                                  | SP (Stainless steel shots)                                                           | Ball on disc (6 mm Al <sub>2</sub> O <sub>3</sub> ball, 15 N, 300-600 m)              | 550E-06 (300 m)<br>556E-06 (600 m)            | 454 E-06                              | 556E-06                               | -17,45455        | 18,34532         |
| 1             | Ti6Al4V (Direct metal laser sintering) | SP (Stainless steel shots)<br>SP (Nutshells)<br>SP (ceramic beads)                   | Ball on disc (ringer solution, 6 mm Al <sub>2</sub> O <sub>3</sub> ball, 10 N, 100 m) | 7.02E-04                                      | 4.45E-04<br>5.35E-04<br>4.14E-04      | 5.79 E-04<br>6.69E-04<br>5.47E-04     | -41,02564        | -4,70085         |
| 2             | [2] Alpha Ti with TiB (AM)             | SP (S-550 steel shots, 100% coverage, 90 psi, 2 min)                                 | Ball on disc (1N-17.5 N loads, 6 mm AISI52100 ball, 160 rpm, 300 m)                   | 480E-06 (1N),<br>520E-06 (15N)                | 480E-06                               | 850E-06                               | 76,31579         | 3,26797          |
| 3             | [3] AA7075 Alloy                       | SP (S230, 200%, 15s, 45psi)                                                          | Reciprocating (10 and 20 N load, 100, 200 and 1000 m, 0.5 m/s)                        | 208E-06 (100 m)<br>249E-06 (1000m)            | 208E-06                               | 690E-06                               | -4,79452         | 30,28169         |
| 4             | [4] 7A52 Al alloy                      | Ultrasonic peening                                                                   | Ball on plate (5 mm GCr15 ball, 90 m, 15m/min, 5N - 50N load)                         | 0.105882 (5 N)<br>0.058824 (50 N)             | 0.082353                              | 0,058824                              | -22,22222        | -31              |
| 5             | [5] AISI 5160                          | SP (White iron ball, 2min)                                                           | Reciprocating (320 N, 2 Hz, 10 min, AISI 52100 steel)                                 | -                                             | 5 %                                   | 73 %                                  | -5               | -73              |
| 6             | [6] AISI 5160                          | SP (White iron ball, 1 – 5 min)                                                      | Ball on disc (200 N, 0.5 m/s, 10 min, PAO <sub>4</sub> immersed)                      | 1.178571                                      | 1.625                                 | 4.321429                              | 37,87884         | 266,66684        |
| 7             | [7] 4Cr9Si2 Valve Steel                | SP (0.2-0.6 MPa air pressure, 0.4-0.6 mm Cr-Mo alloy steel shots)                    | Pin on disc (DZ22 superalloy steel 6 mm pin, 200 N, 450 °C, 1800 s)                   | 5.211                                         | 1.812                                 | 3.275                                 | -65,2274         | 37,15218         |
| 8             | [8] 17Cr2Ni 2MoVN b stee               | SP (0.4, 0.5, and 0.6 MPa air pressure, zirconia shots (0.6 mm))                     | Ball on disc (3 mm AISI 52100 steel ball, 0.092 m/s and 300 N, lubricated cond.)      | 4.134                                         | 0.832                                 | 2.348                                 | -79,87421        | 43,20271         |
| 9             | [9] Al7075-T6511 alloy                 | SP (S230 steel balls (0.3 mm), 0.35 and 0.45 mmA SP intensities)                     | Pin on disc (GCr15 steel pin, 20 N, 60 min, sliding of 50 r min <sup>-1</sup> )       | 2.51                                          | 0.316                                 | 0.734                                 | -87,41036        | 70,75697         |
| 10            | [10] 17-4PH steel (AM)                 | SP (0.3 and 0.6 MPa air pressure, stainless steel, nutshell granules, ceramic beads) | Ball on disc (WC-Co (6 mm), 10 N, 0.1 m/s)                                            | 2.05E-04                                      | 1.32E-04                              | 1.66E-04                              | -35,60976        | -19,02439        |

## References

- [1] R. Żebrowski, M. Walczak, Effect of The Shot Peening on Surface Properties and Tribological Performance of Ti-6Al-4V Alloy Produced by Means of DMLS Technology, *Archives of Metallurgy and Materials* 64(1) (2019) 377-386. 10.24425/amm.2019.126263.
- [2] L.-A. DiCecco, M. Mehdi, A. Edrisy, Dry-Sliding Wear Mechanisms of Shot-Peened Additive Manufactured Alpha Titanium Featuring TiB Particles, *Tribology Letters* 69(3) (2021). 10.1007/s11249-021-01456-4.
- [3] Y. Efe, I. Karademir, F. Husem, E. Maleki, O. Unal, Surface Severe Plastically Deformed Nanostructured AA7075 Alloy: Assessment on Tribological and Axial Fatigue Behaviors, *Journal of Materials Engineering and Performance* 29(6) (2020) 3774-3783. 10.1007/s11665-020-04892-w.
- [4] C. Chen, H. Zhang, Characteristics of friction and wear of Al-Zn-Mg-Cu alloy after application of ultrasonic shot peening technology, *Surface and Coatings Technology* 423 (2021). 10.1016/j.surfcoat.2021.127615.

- 
- [5] X. Han, Z. Zhang, J. Hou, G.C. Barber, F. Qiu, Tribological behavior of shot peened/austempered AISI 5160 steel, *Tribology International* 145 (2020). 10.1016/j.triboint.2020.106197.
- [6] X. Han, Z. Zhang, B. Pang, G.C. Barber, J. Zhao, F. Qiu, The Effect of Shot-Peening Time on Tribological Behavior of AISI5160 Steel, *Tribology Transactions* (2022) 1-12. 10.1080/10402004.2022.2078257.
- [7] S. Jia, S. Qu, X. Hu, F. Lai, C. Duan, X. Li, Effect of Shot Peening on Microstructures and High-Temperature Tribological Properties of 4Cr9Si2 Valve Steel, *steel research international* 92(11) (2021). 10.1002/srin.202100250.
- [8] Y. Zhang, F. Lai, S. Qu, V. Ji, H. Liu, X. Li, Effect of shot peening on residual stress distribution and tribological behaviors of 17Cr2Ni2MoVNB steel, *Surface and Coatings Technology* 386 (2020). 10.1016/j.surfcoat.2020.125497.
- [9] H. Zhang, X. Qiu, X. Zhao, D. Xu, Effect of surface self-nanocrystallization on friction and wear behavior of Al7075-T6511 alloy, *Materials Research Express* 6(11) (2019). 10.1088/2053-1591/ab4640.
- [10] M. Walczak, M. Szala, Effect of shot peening on the surface properties, corrosion and wear performance of 17-4PH steel produced by DMLS additive manufacturing, *Archives of Civil and Mechanical Engineering* 21(4) (2021). 10.1007/s43452-021-00306-3.
